# Supplementary material
Source: publisher site journal article supplement (https://www.dovepress.com/article/573018)
Supplement: Supplementary file 1 [file Supplementary%2520file%2520.docx]

**Supplementary File**

**Table S1.** Results of multivariate COX regression

| Variables | Coefficients | HR(95%CI) | Cutoff values | *p* value |
| --- | --- | --- | --- | --- |
| eGFR, mL/min/1.73m2 | -0.0147 | 0.985(0.975-0.996) | 53 | 0.006 |
| Age, years | 0.0563 | 1.058(1.022-1.095) | 56 | 0.001 |
| PLT, × 109/L | -0.0219 | 0.978(0.963-0.994) | 44 | 0.008 |
| APTT, s | 0.0278 | 1.028(1.012-1.045) | 66.8 | <0.0001 |

**Notes:**

**Abbreviations:** APTT, activated partial thromboplastin time; PLT, platelet; eGFR, estimated glomerular filtration rate.

**Table S2.** Predictive index levels between survival and fatal groups of of SFTS Patients

| Characteristics | Total |  | Fatal group |  | Survival group |  | *p* value |
| --- | --- | --- | --- | --- | --- | --- | --- |
| n=260 |  | n=51 |  | n=209 |  |
| Status, n(%) | 260 |  | 51 (19.6) |  | 209 (80.4) |  | <0.0001 |
| Risk.Score (median (IQR)) | 2.58 (1.44, 3.46) |  | 3.86 (3.15, 4.32) |  | 2.18(1.19, 3.14) |  | <0.0001 |
| AER (median (IQR)) | 0.55 (0.46, 0.79) |  | 0.86 (0.70, 1.28) |  | 0.51 (0.43, 0.65) |  | <0.0001 |
| APRI (median (IQR)) | 3.06 (1.25, 8.67) |  | 8.71 (3.45, 20.38) |  | 2.25 (1.06, 6.22) |  | <0.0001 |
| BAR (median (IQR)) | 4.74 (3.54, 6.52) |  | 6.92 (5.25, 10.34) |  | 4.43 (3.30, 5.83) |  | <0.0001 |
| CAR (median (IQR)) | 0.12 (0.05, 0.30) |  | 0.21 (0.08, 0.45) |  | 0.10 (0.04, 0.26) |  | 0.0019 |

**Notes:**

**Abbreviations:** Abbreviation: Risk score: composite model; AER: APTT/eGFR ratio; BAR: blood urea nitrogen /albumin ratio; APRI: aspartate aminotransferase /platelet index; CAR: C-reactive protein /albumin ratio. The *p*-values describe the comparison between survival and fatal groups. Continuous variable data are presented as mean (SD) and median (IQR).


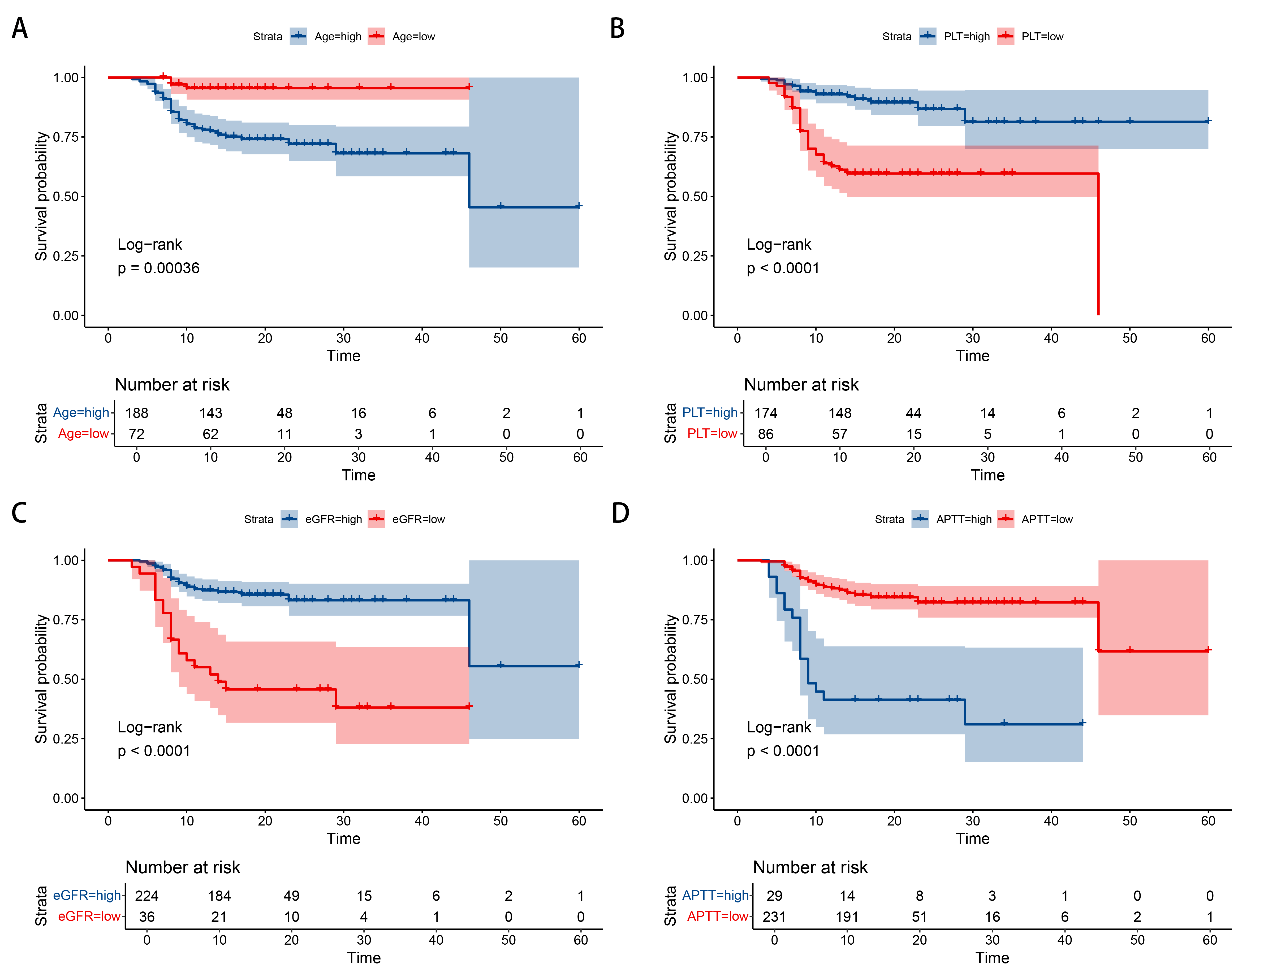


**Figure S1.** Kaplan-Meier survival analysis of SFTS mortality risk stratified through four core clinical indicators.

(A) Age stratified curves. The survival probability of young patients (blue line) was significantly higher than that of elderly patients (log-rank *p* = 0.00036). (B) PLT stratified curves. Significantly higher survival probability observed in patients with higher platelet levels (blue line) compared to those with lower platelet counts (red line; log-rank *p* < 0.0001). (C) eGFR stratified curves. Patients with higher eGFR (blue line) demonstrated superior survival probability compared to those with lower eGFR values (red line; log-rank *p* < 0.0001). (D) APTT stratified curves. Shorter APTT values (blue line) correlated with better prognosis compared to prolonged APTT levels (red line; log-rank *p* < 0.0001).

**Notes:**

**Abbreviations:** SFTS, severe fever with thrombocytopenia syndrome. Abbreviation: PLT, platelet; eGFR, estimated glomerular filtration rates; APTT, activated partial thromboplastin time.


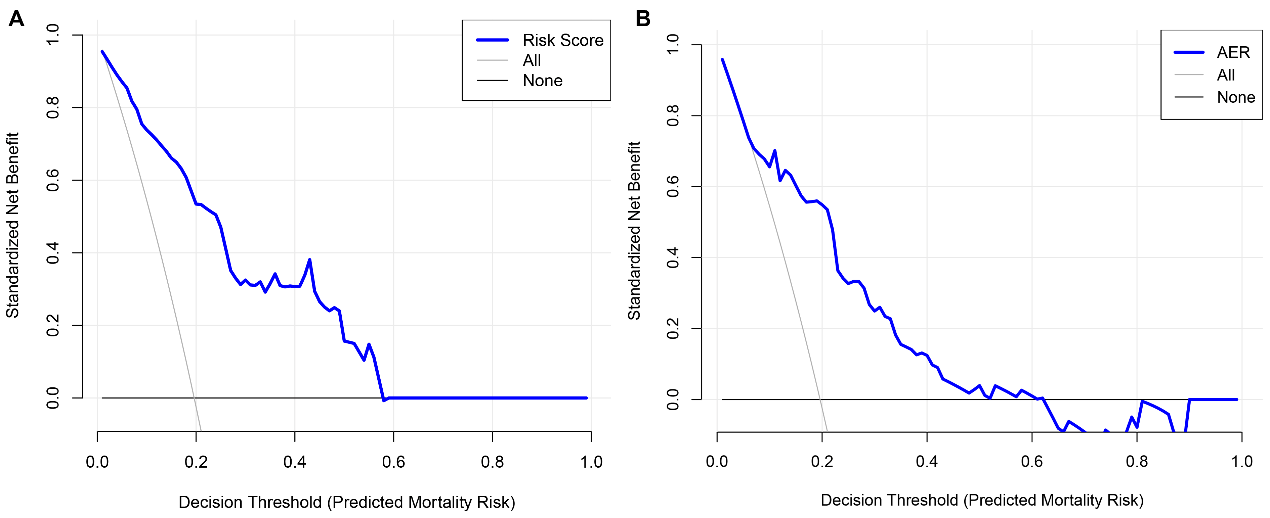


**Figure S2.** Decision Curve Analysis (DCA) of the predictive model for mortality risk and AER index in SFTS.


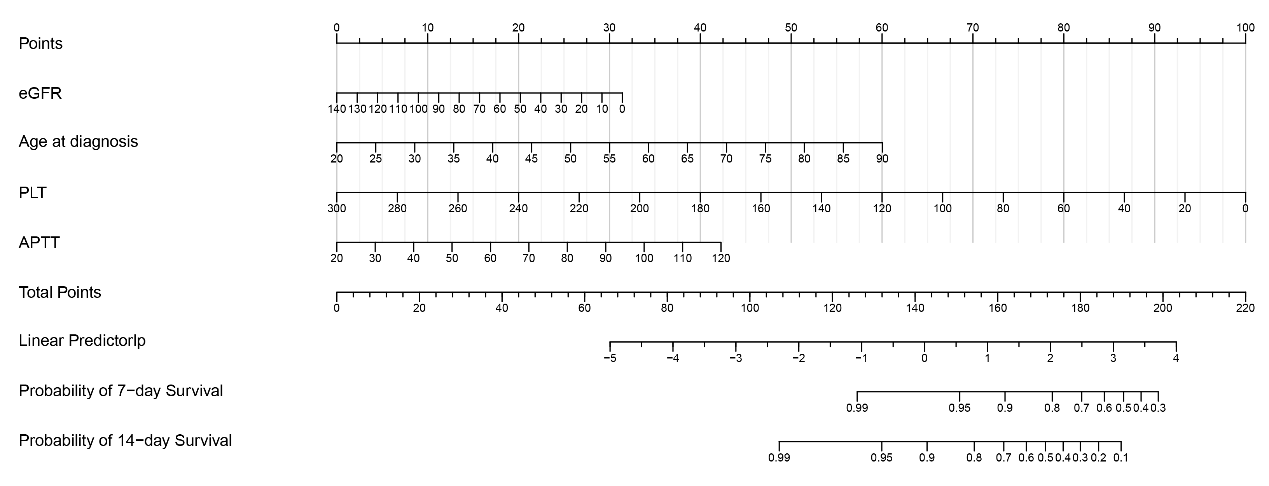


**Figure S3.** Prognostic nomogram incorporating four critical predictors for SFTS mortality risk.


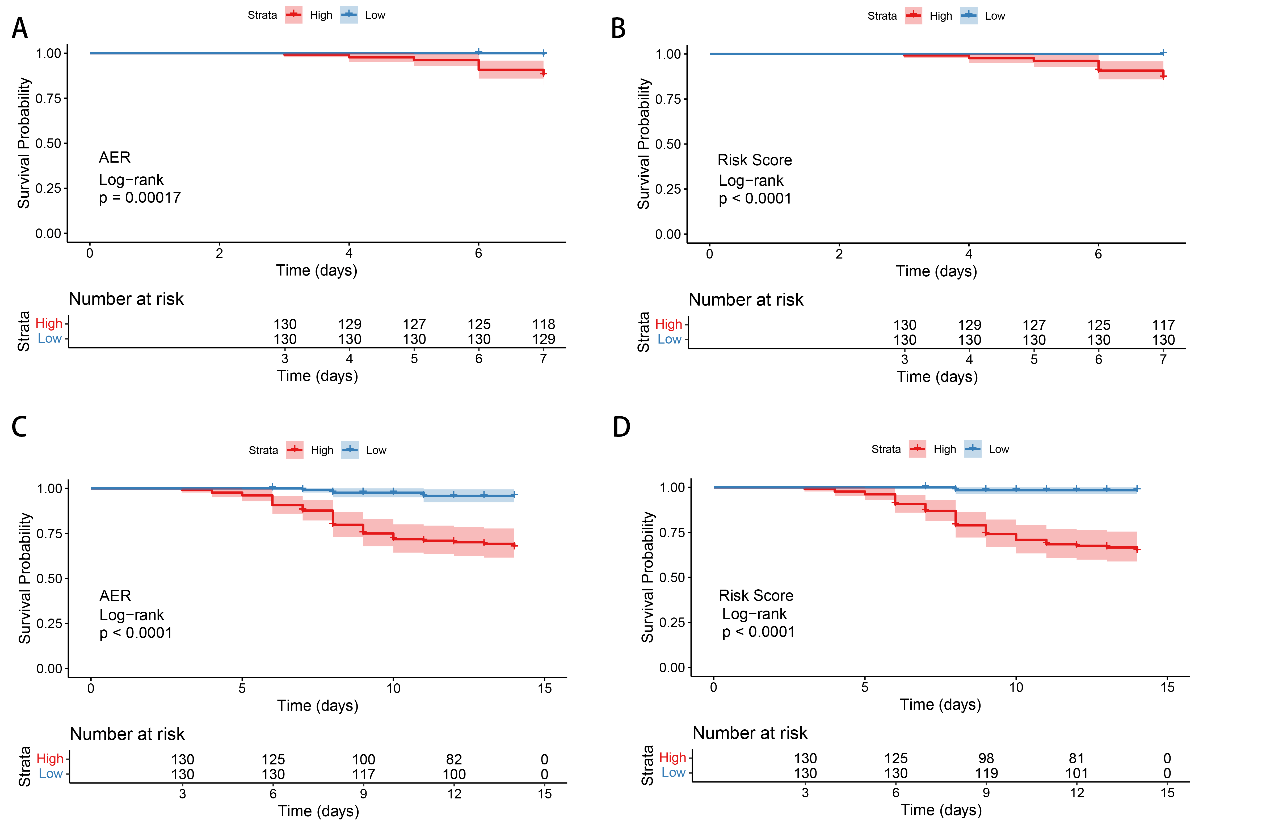


**Figure S4.** Kaplan-Meier survival analysis of SFTS mortality risk stratified by AER and Risk Score at 7-day and 14-day time points.

(A) 7-day survival stratified by AER. Patients with low AER levels (blue line) showed significantly higher survival probability compared to those with high AER levels (log-rank *p* = 0.00017). (B) 7-day survival stratified by Risk Score. Patients with lower Risk Score (blue line) exhibited significantly higher survival probability than those with higher Risk Score (red line; log-rank *p* < 0.0001). (C) 14-day survival stratified by AER. Patients with lower AER levels (blue line) demonstrated significantly higher survival probability compared to those with higher AER levels (red line; log-rank *p* < 0.0001). (D) 14-day survival stratified by Risk Score. Patients with lower Risk Score (blue line) showed significantly higher survival probability than those with higher Risk Score (red line; log-rank *p* < 0.0001).
